# Supplementary material for: The regulation of hydroxysteroid 17β-dehydrogenase type 1 and 2 gene expression in breast cancer cell lines by estradiol, dihydrotestosterone, microRNAs, and genes related to breast cancer
Source: PubMed Central journal article supplement (PMC5617496; doi:10.18632/oncotarget.19136), 2017-07-10
Supplement: oncotarget-08-62183-s001.pdf [file oncotarget-08-62183-s001.pdf]

# The regulation of hydroxysteroid 17 $\beta$ -dehydrogenase type 1 and 2 gene expression in breast cancer cell lines by estradiol, dihydrotestosterone, microRNAs, and genes related to breast cancer

## SUPPLEMENTARY MATERIALS

### Protein blotting

Protein from the hormonal treatment was isolated using RIPA, followed by centrifugation at 12 000g for 10 minutes. Protein lysates (25 $\mu$ g) were mixed 1:1 with Laemmli sample buffer (Bio-Rad, Hercules, CA, USA) heated in 95°C and loaded onto Mini-PROTEAN TGX precast gels (4-15% Tris-HCl; Bio-Rad). The proteins were separated at 90 V for 5 min followed by 150 V for 35 minutes using 1x Tris-Glycine-SDS (TGS) buffer, transferred onto a PVDF membrane (TBT Blotting System Transfer Pack; Bio-Rad) in a Trans-Blot® Turbo™ (Bio-Rad). The membranes were washed in Tris-buffered Saline (TBS) + 0.1% tween20, and blocked in TBS + 0.1%

tween20 (TBST) + 5% non-fat powder milk for 60 min in room temperature. The primary antibody monoclonal rabbit anti-human estrogen receptor (04-820, Clone 60c, Merck KGaA, Darmstadt Germany) was diluted 1:1000 in TBST 5% milk, and incubated in 4°C overnight. The membranes were washed and incubated for an hour with the secondary antibody (1:1 000, anti-rabbit; DAKO) in room temperature. The binding of the antibody to the membrane was detected using ELCprime + Western Blotting Detection System (Amersham Biosciences/GE Healthcare, Piscataway, NJ, USA), and developed on an Amersham Hyperfilm™ ECL (GE Healthcare, Piscataway, NJ, USA). GAPDH 1:5000 (EPR6256 Abcam, Cambridge, UK) was used as a reference protein.

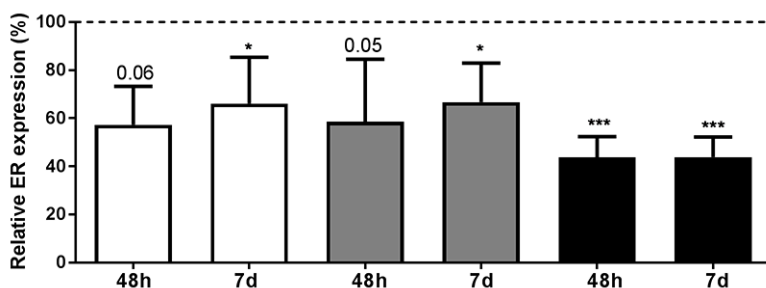

Supplementary Figure 1: Relative ERα expression following ERα downregulation at 48 hours and 7 days compared to scrambled siRNA control. ZR-75-1 (white), MCF7 (gray) and T-47D (black), n=3. Error bars represent standard derivation.

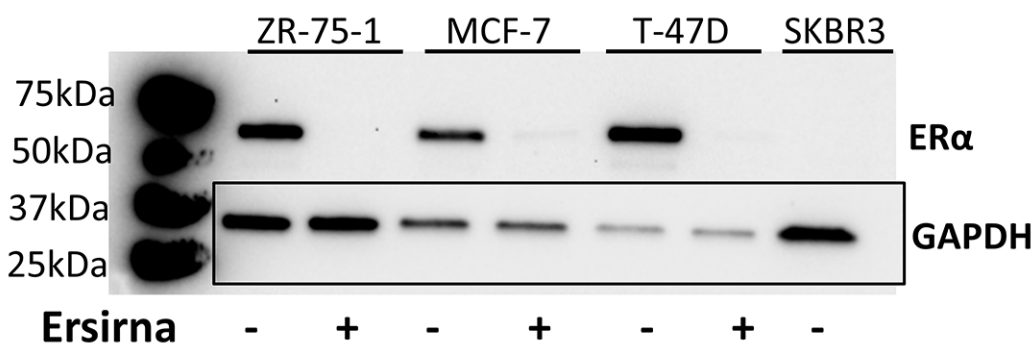

Supplementary Figure 2: Protein expression of ERα at 48 hours (04-820, Clone 60c, Merck KGaA) following ER siRNA or scrambled siRNA respectively in ZR-75-1 (1-2), MCF7 (3-4), T-47D (5-6), and untreated SK-BR-3 (7). GAPDH (EPR6256 Abcam, Cambridge, UK) was used as a reference protein. All bands were exposed for the same duration and treated the same in image generation and no modifications were performed apart from image cropping. See supplement materials and methods for details of the experimental conditions.

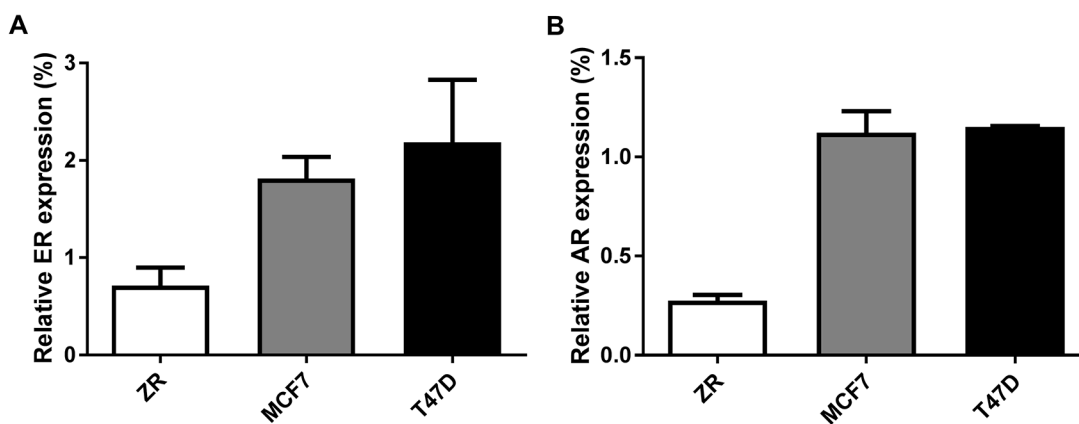

Supplementary Figure 3: The relative amount of ERα and AR at 48 hours. ZR-75-1 (white), MCF7 (gray) and T-47D (black), n=3. Error bars represent standard derivation.

## Supplementary Table 1: miRNA used in the current study

See Supplementary File 1

## Supplementary Table 2: siRNA used in the current study

|               |                            |                                          |                |
|---------------|----------------------------|------------------------------------------|----------------|
| GREB1         | SilenceSelect siRNA        | Thermo Fisher Scientific, MA, USA        | s18650         |
| <b>GREB1</b>  | <b>SilenceSelect siRNA</b> | <b>Thermo Fisher Scientific, MA, USA</b> | <b>s18651</b>  |
| <b>HRAS</b>   | <b>SilenceSelect siRNA</b> | <b>Thermo Fisher Scientific, MA, USA</b> | <b>s808</b>    |
| HRAS          | SilenceSelect siRNA        | Thermo Fisher Scientific, MA, USA        | s807           |
| <b>PRKCZ</b>  | <b>SilenceSelect siRNA</b> | <b>Thermo Fisher Scientific, MA, USA</b> | <b>s11128</b>  |
| PRKCZ         | SilenceSelect siRNA        | Thermo Fisher Scientific, MA, USA        | s11129         |
| ACE2          | SilenceSelect siRNA        | Thermo Fisher Scientific, MA, USA        | s33966         |
| ACE2          | SilenceSelect siRNA        | Thermo Fisher Scientific, MA, USA        | s33965         |
| CHI3L1/YKL40  | SilenceSelect siRNA        | Thermo Fisher Scientific, MA, USA        | s2999          |
| CHI3L1/YKL40  | SilenceSelect siRNA        | Thermo Fisher Scientific, MA, USA        | s2998          |
| CX3CL1        | SilenceSelect siRNA        | Thermo Fisher Scientific, MA, USA        | s226987        |
| <b>CX3CL1</b> | <b>SilenceSelect siRNA</b> | <b>Thermo Fisher Scientific, MA, USA</b> | <b>s12631</b>  |
| <b>ER</b>     | <b>SilenceSelect siRNA</b> | <b>Thermo Fisher Scientific, MA, USA</b> | <b>S4823</b>   |
| <b>EPHB6</b>  | <b>SilenceSelect siRNA</b> | <b>Thermo Fisher Scientific, MA, USA</b> | <b>s4748</b>   |
| EPHB6         | SilenceSelect siRNA        | Thermo Fisher Scientific, MA, USA        | s4747          |
| KLK5          | SilenceSelect siRNA        | Thermo Fisher Scientific, MA, USA        | s223657        |
| <b>KLK5</b>   | <b>SilenceSelect siRNA</b> | <b>Thermo Fisher Scientific, MA, USA</b> | <b>s223656</b> |
| KLK7          | SilenceSelect siRNA        | Thermo Fisher Scientific, MA, USA        | s11269         |
| KLK7          | SilenceSelect siRNA        | Thermo Fisher Scientific, MA, USA        | s11268         |
| OLFM4         | SilenceSelect siRNA        | Thermo Fisher Scientific, MA, USA        | s20724         |
| OLFM4         | SilenceSelect siRNA        | Thermo Fisher Scientific, MA, USA        | s20722         |
| TP63          | SilenceSelect siRNA        | Thermo Fisher Scientific, MA, USA        | s229399        |
| <b>TP63</b>   | <b>SilenceSelect siRNA</b> | <b>Thermo Fisher Scientific, MA, USA</b> | <b>s16411</b>  |
| <b>TRIM29</b> | <b>SilenceSelect siRNA</b> | <b>Thermo Fisher Scientific, MA, USA</b> | <b>s24283</b>  |
| TRIM29        | SilenceSelect siRNA        | Thermo Fisher Scientific, MA, USA        | s24285         |

\* Bold siRNA were used for the validation, and results from them are shown in the paper.

**Supplementary Table 3: Taqman assays used in the current study**

|                     |               |                                   |
|---------------------|---------------|-----------------------------------|
| <i>ER</i>           | hs00174860_m1 | Thermo Fisher Scientific, MA, USA |
| <i>HSD17B2</i>      | Hs00157993_m1 | Thermo Fisher Scientific, MA, USA |
| <i>PPiA</i>         | Hs99999904_m1 | Thermo Fisher Scientific, MA, USA |
| <i>BAKT</i>         | 4352935E      | Thermo Fisher Scientific, MA, USA |
| <i>GREB1</i>        | Hs00536409_m1 | Thermo Fisher Scientific, MA, USA |
| <i>HRAS</i>         | Hs00978050_g1 | Thermo Fisher Scientific, MA, USA |
| <i>PRK CZ</i>       | Hs00177051_m1 | Thermo Fisher Scientific, MA, USA |
| <i>ACE2</i>         | Hs01085333_m1 | Thermo Fisher Scientific, MA, USA |
| <i>CHI3L1/YKL40</i> | Hs01072228_m1 | Thermo Fisher Scientific, MA, USA |
| <i>CX3CL1</i>       | Hs00171086_m1 | Thermo Fisher Scientific, MA, USA |
| <i>EPHB6</i>        | Hs01071143_g1 | Thermo Fisher Scientific, MA, USA |
| <i>KLK5</i>         | Hs01548153_m1 | Thermo Fisher Scientific, MA, USA |
| <i>KLK7</i>         | Hs00192503_m1 | Thermo Fisher Scientific, MA, USA |
| <i>OLFM4</i>        | Hs04234962_m1 | Thermo Fisher Scientific, MA, USA |
| <i>TP63</i>         | Hs00978340_m1 | Thermo Fisher Scientific, MA, USA |
| <i>TRIM29</i>       | Hs00232590_m1 | Thermo Fisher Scientific, MA, USA |
| <i>TRPV6</i>        | Hs01114089_g1 | Thermo Fisher Scientific, MA, USA |

**Supplementary Table 4: Roles of the tested genes in the current study**

See Supplementary File 2
